# Supplementary material
Source: PubMed Central journal article supplement (PMC327148)
Supplement: pnas_2637002100_1.pdf [file pnas_2637002100_1.pdf]

Table 1. List of compounds that did not activate GPR41 on melanophores

|                                          |                                                              |                                                                                                                          |
|------------------------------------------|--------------------------------------------------------------|--------------------------------------------------------------------------------------------------------------------------|
| formic acid*                             | CH <sub>2</sub> O <sub>2</sub>                               | HCOOH                                                                                                                    |
| heptanoic acid*                          | C <sub>7</sub> H <sub>14</sub> O <sub>2</sub>                | CH <sub>3</sub> (CH <sub>2</sub> ) <sub>5</sub> COOH                                                                     |
| valproic acid*                           | C <sub>8</sub> H <sub>16</sub> O <sub>2</sub>                | CH <sub>3</sub> CH <sub>2</sub> CH <sub>2</sub> CH(CH <sub>2</sub> CH <sub>2</sub> CH <sub>3</sub> )COOH                 |
| capric acid†                             | C <sub>10</sub> H <sub>20</sub> O <sub>2</sub>               | CH <sub>3</sub> (CH <sub>2</sub> ) <sub>8</sub> COOH                                                                     |
| palmitoleic acid†                        | C <sub>16</sub> H <sub>30</sub> O <sub>2</sub>               | CH <sub>3</sub> (CH <sub>2</sub> ) <sub>5</sub> CHCH(CH <sub>2</sub> ) <sub>7</sub> COOH                                 |
| oleic acid†                              | C <sub>18</sub> H <sub>34</sub> O <sub>2</sub>               | CH <sub>3</sub> (CH <sub>2</sub> ) <sub>7</sub> CHCH(CH <sub>2</sub> ) <sub>7</sub> COOH                                 |
| linoleic acid†                           | C <sub>18</sub> H <sub>32</sub> O <sub>2</sub>               | CH <sub>3</sub> (CH <sub>2</sub> ) <sub>3</sub> (CH <sub>2</sub> CHCH) <sub>2</sub> (CH <sub>2</sub> ) <sub>7</sub> COOH |
| linolenic acid†                          | C <sub>18</sub> H <sub>30</sub> O <sub>2</sub>               | CH <sub>3</sub> (CH <sub>2</sub> CHCH) <sub>3</sub> (CH <sub>2</sub> ) <sub>7</sub> COOH                                 |
| arachidonic acid†                        | C <sub>20</sub> H <sub>32</sub> O <sub>2</sub>               | CH <sub>3</sub> (CH <sub>2</sub> ) <sub>3</sub> (CH <sub>2</sub> CHCH) <sub>4</sub> (CH <sub>2</sub> ) <sub>3</sub> COOH |
| cis-4,7,10,13,16,19-docosaehaenoic acid† | C <sub>22</sub> H <sub>32</sub> O <sub>2</sub>               | CH <sub>3</sub> (CH <sub>2</sub> CHCH) <sub>6</sub> (CH <sub>2</sub> ) <sub>2</sub> COOH                                 |
| hydrochloric acid*                       | HCl                                                          | HCl                                                                                                                      |
| 1-propanol*                              | C <sub>3</sub> H <sub>8</sub> O                              | CH <sub>3</sub> (CH <sub>2</sub> ) <sub>2</sub> OH                                                                       |
| isopropanol*                             | C <sub>3</sub> H <sub>8</sub> O                              | (CH <sub>3</sub> ) <sub>2</sub> CHOH                                                                                     |
| pyruvic acid*                            | C <sub>3</sub> H <sub>4</sub> O <sub>3</sub>                 | CH <sub>3</sub> COCOOH                                                                                                   |
| malonic acid*                            | C <sub>3</sub> H <sub>4</sub> O <sub>2</sub>                 | CH <sub>2</sub> (COOH) <sub>2</sub>                                                                                      |
| lactic acid*                             | C <sub>3</sub> H <sub>6</sub> O <sub>3</sub>                 | CH <sub>3</sub> CHOHCOOH                                                                                                 |
| malonyl CoA*                             | C <sub>3</sub> H <sub>3</sub> O <sub>3</sub> SCoA            | HOOCCH <sub>2</sub> COSCoA                                                                                               |
| acetoacetic acid*                        | C <sub>4</sub> H <sub>6</sub> O <sub>3</sub>                 | CH <sub>3</sub> COCH <sub>2</sub> COOH                                                                                   |
| fumaric acid*                            | C <sub>4</sub> H <sub>4</sub> O <sub>4</sub>                 | HOOCCHCHCOOH                                                                                                             |
| α-hydroxybutyric acid*                   | C <sub>4</sub> H <sub>8</sub> O <sub>3</sub>                 | CH <sub>3</sub> CH <sub>2</sub> CH(OH)COOH                                                                               |
| β-hydroxybutyric acid*                   | C <sub>4</sub> H <sub>8</sub> O <sub>3</sub>                 | CH <sub>3</sub> CH(OH)CH <sub>2</sub> COOH                                                                               |
| 1-butanol*                               | C <sub>4</sub> H <sub>10</sub> O                             | CH <sub>3</sub> (CH <sub>2</sub> ) <sub>2</sub> CH <sub>2</sub> OH                                                       |
| succinic acid*                           | C <sub>4</sub> H <sub>6</sub> O <sub>4</sub>                 | HOOCCH <sub>2</sub> CH <sub>2</sub> COOH                                                                                 |
| succinyl CoA*                            | C <sub>4</sub> H <sub>5</sub> O <sub>3</sub> SCoA            | HOOCCH <sub>2</sub> CH <sub>2</sub> COSCoA                                                                               |
| γ-amino-n-butyric acid*                  | C <sub>4</sub> H <sub>9</sub> O <sub>2</sub> N               | NH <sub>2</sub> (CH <sub>2</sub> ) <sub>3</sub> COOH                                                                     |
| α-ketogultaric acid‡                     | C <sub>5</sub> H <sub>6</sub> O <sub>5</sub>                 | HOOCCH <sub>2</sub> CH <sub>2</sub> COCOOH                                                                               |
| glutamine*                               | C <sub>5</sub> H <sub>10</sub> N <sub>2</sub> O <sub>3</sub> | H <sub>2</sub> NCO(CH <sub>3</sub> ) <sub>2</sub> CH <sub>2</sub> (NH <sub>2</sub> )COOH                                 |
| citric acid*                             | C <sub>6</sub> H <sub>8</sub> O <sub>7</sub>                 | HOC(COOH)(CH <sub>2</sub> COOH) <sub>2</sub>                                                                             |
| isocitric acid*                          | C <sub>6</sub> H <sub>8</sub> O <sub>7</sub>                 | HOC(CH <sub>2</sub> COOH)(HOCHCOOH)COOH                                                                                  |
| leucine*                                 | C <sub>6</sub> H <sub>13</sub> NO <sub>2</sub>               | (CH <sub>3</sub> ) <sub>2</sub> CHCH <sub>2</sub> CH(NH <sub>2</sub> )COOH                                               |

\*Compounds were tested at concentrations up to 10 mM.

†Compounds were tested at concentrations up to 100 μM.

‡Compounds were tested at concentrations up to 1 mM.
